# Supplementary material for: Interventions for frail community-dwelling older adults have no significant effect on adverse outcomes: a systematic review and meta-analysis
Source: PubMed Central journal article supplement (PMC6195949; doi:10.1186/s12877-018-0936-7), 2018-10-20

**Additional Figure S1: Flow chart**

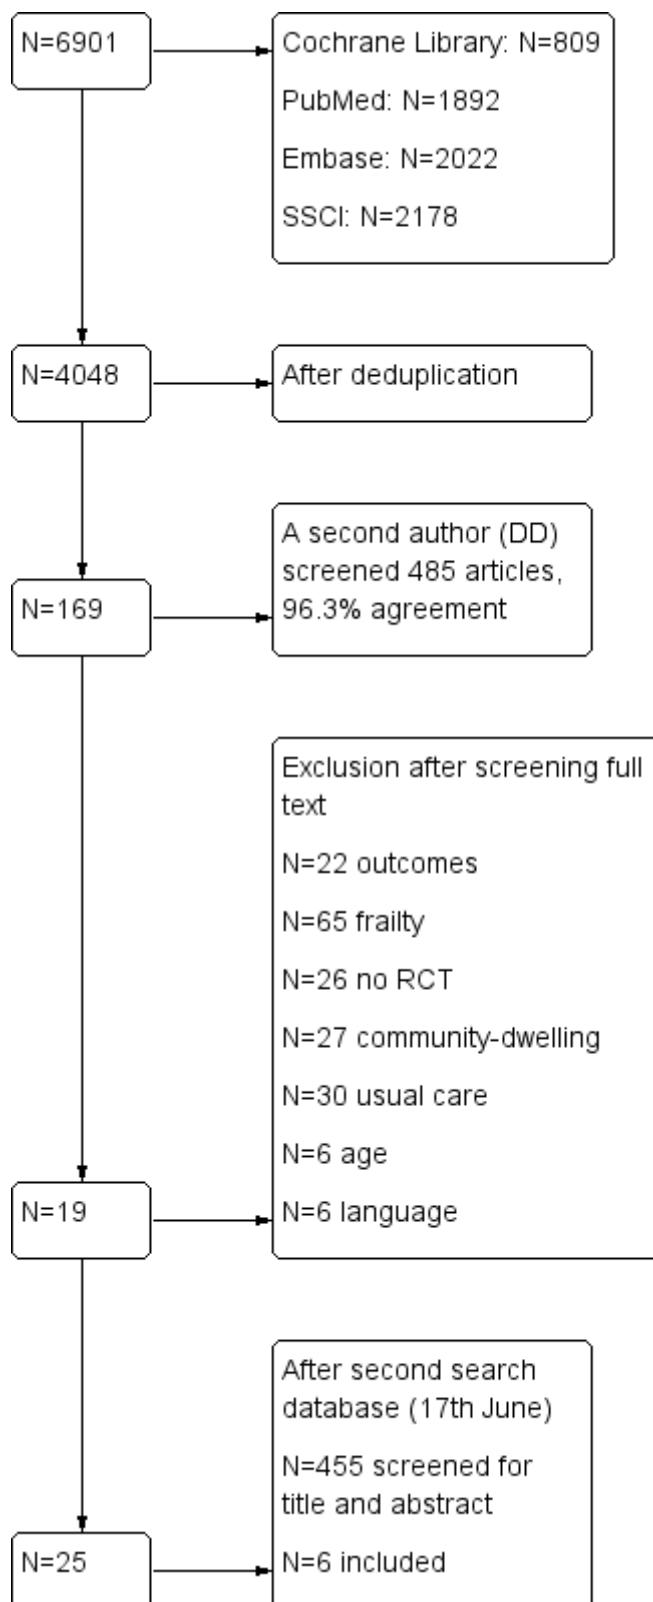

Supplement: 12877_2018_936_MOESM3_ESM.pdf [file 12877_2018_936_MOESM3_ESM.pdf]
