# Supplementary material for: Interventions for frail community-dwelling older adults have no significant effect on adverse outcomes: a systematic review and meta-analysis
Source: Springer Nature journal article supplement (doi:10.1186/s12877-018-0936-7), 2018-10-20

## Additional Figures S2: Forest plot and Funnel plot

Forest plot: intervention case management, outcome mortality

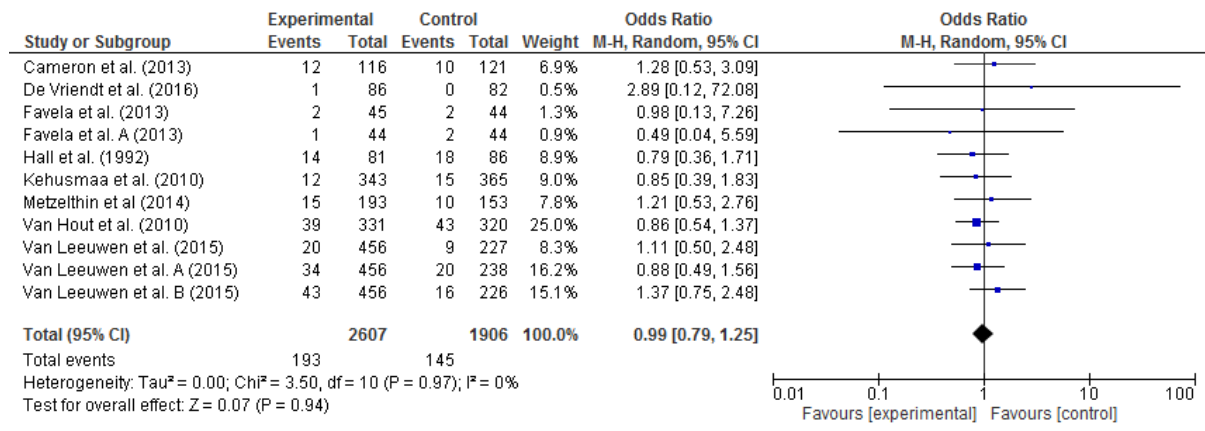

Funnel plot: intervention case management, outcome mortality

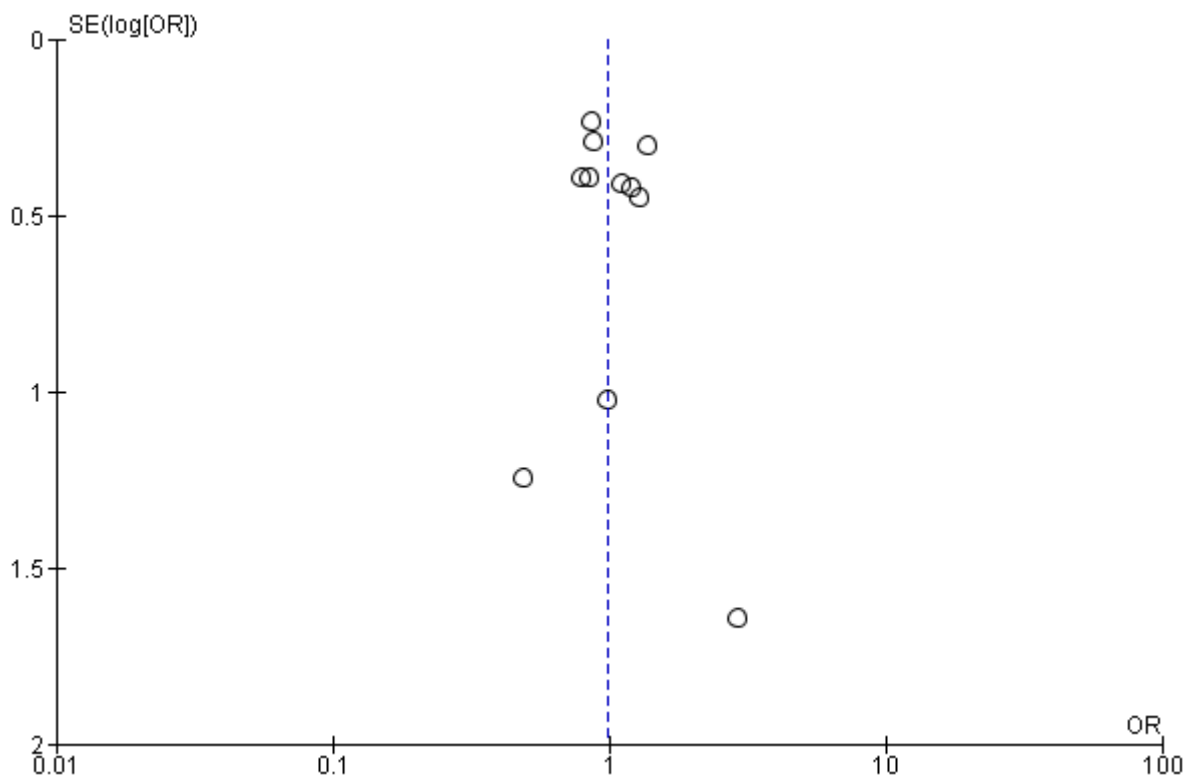

Forest plot: intervention case management, outcome institutionalization

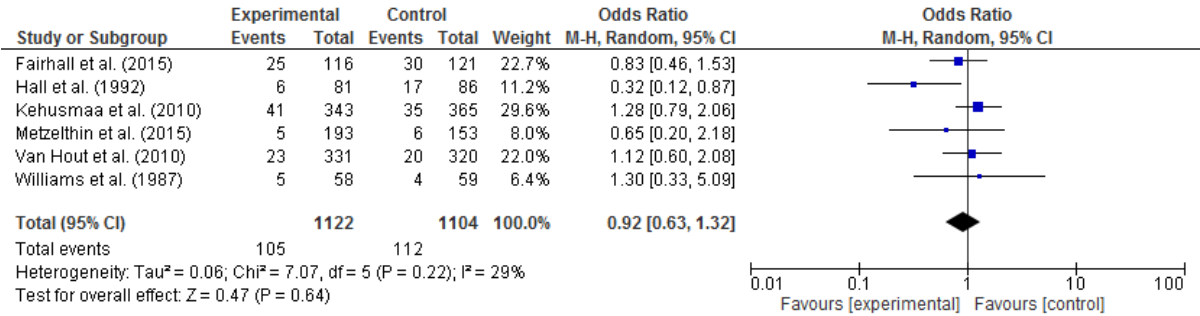

Funnel plot: intervention case management, outcome institutionalization

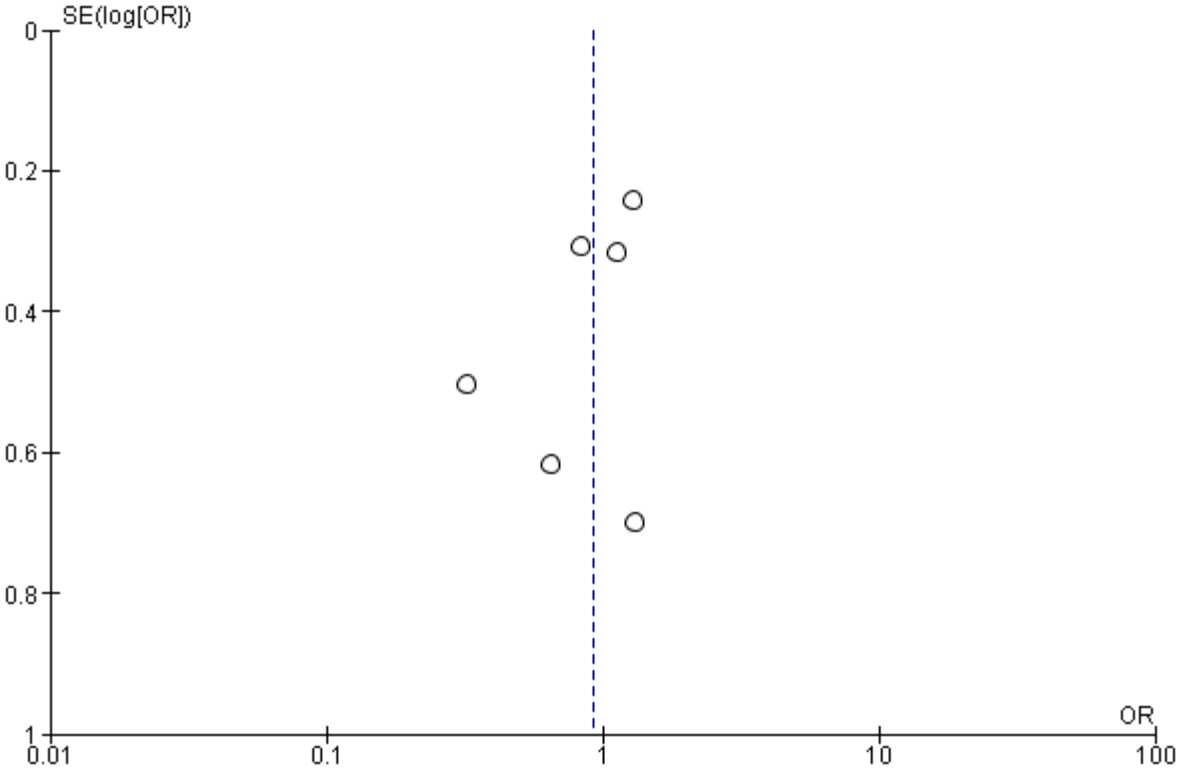

Forest plot: intervention case management, outcome hospitalization

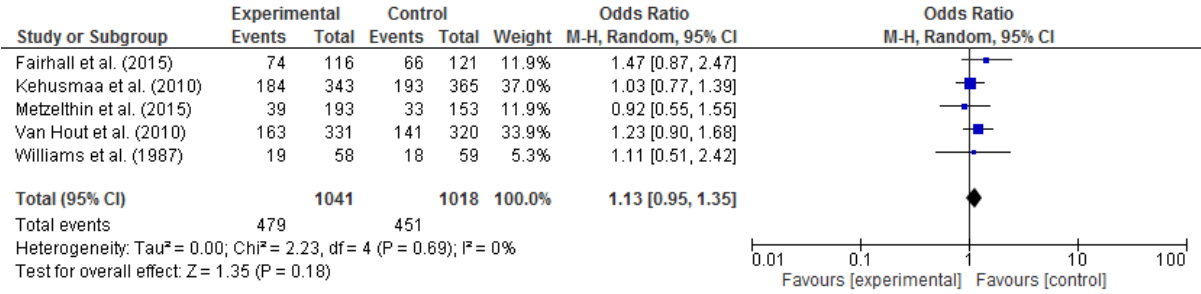

Funnel plot: intervention case management, outcome hospitalization

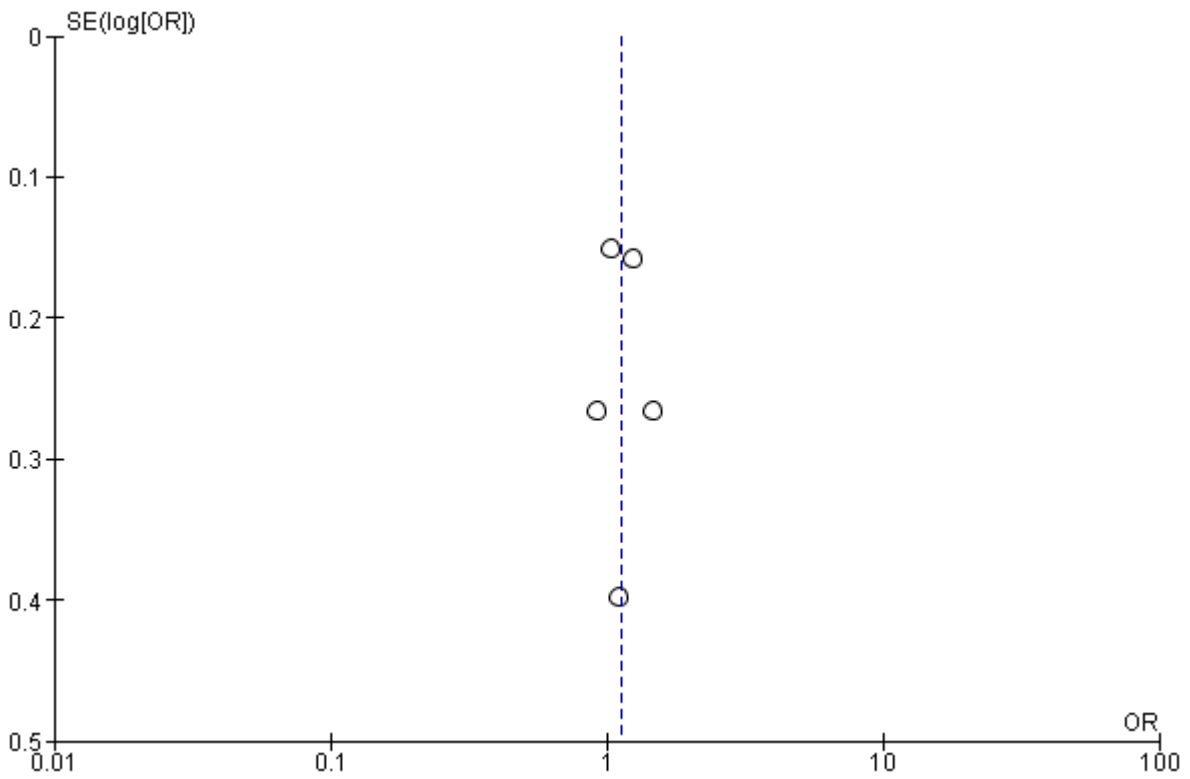

Forest plot: intervention information provision, outcome mortality

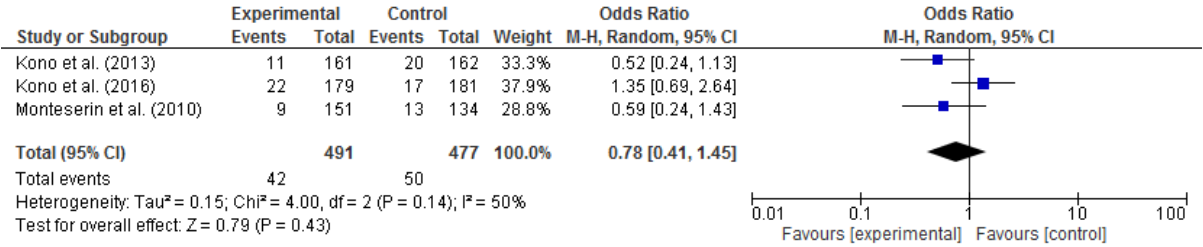

Funnel plot: intervention information provision, outcome mortality

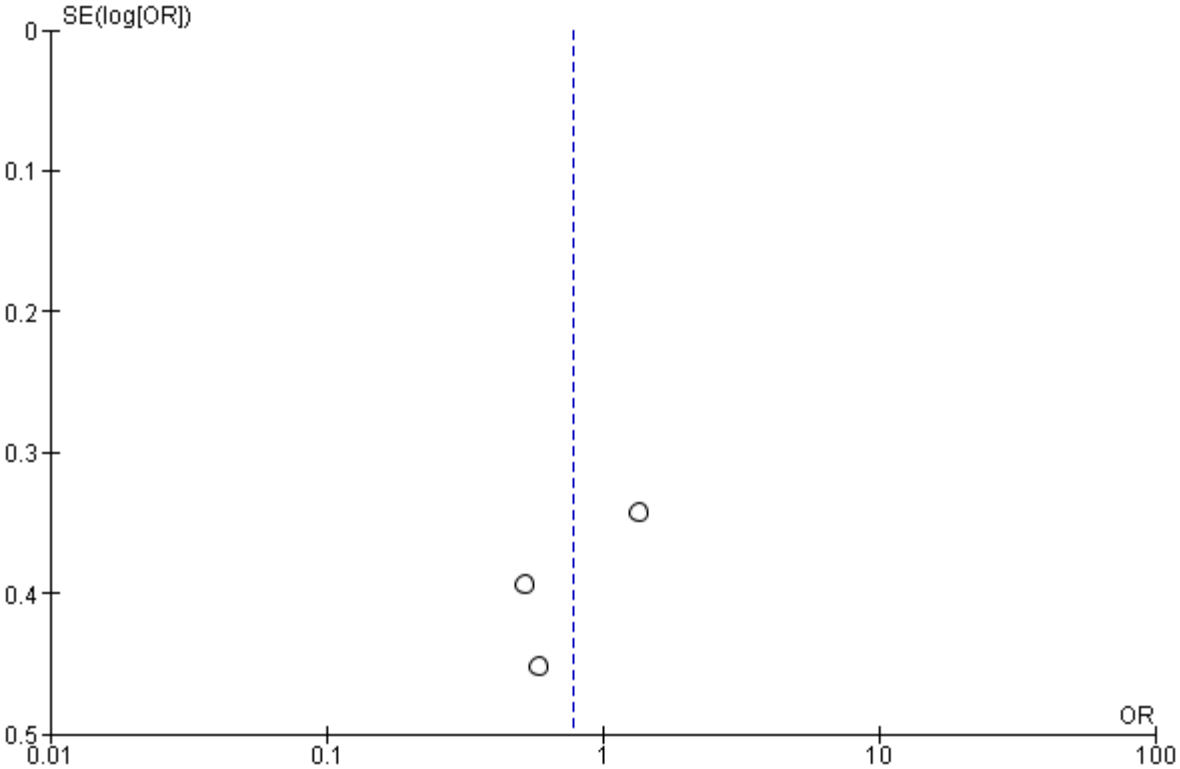

Forest plot: intervention information provision, outcome institutionalization

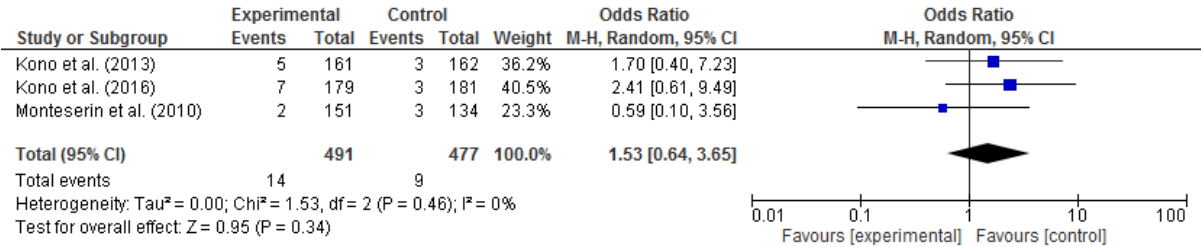

Funnel plot: intervention information provision, outcome institutionalization

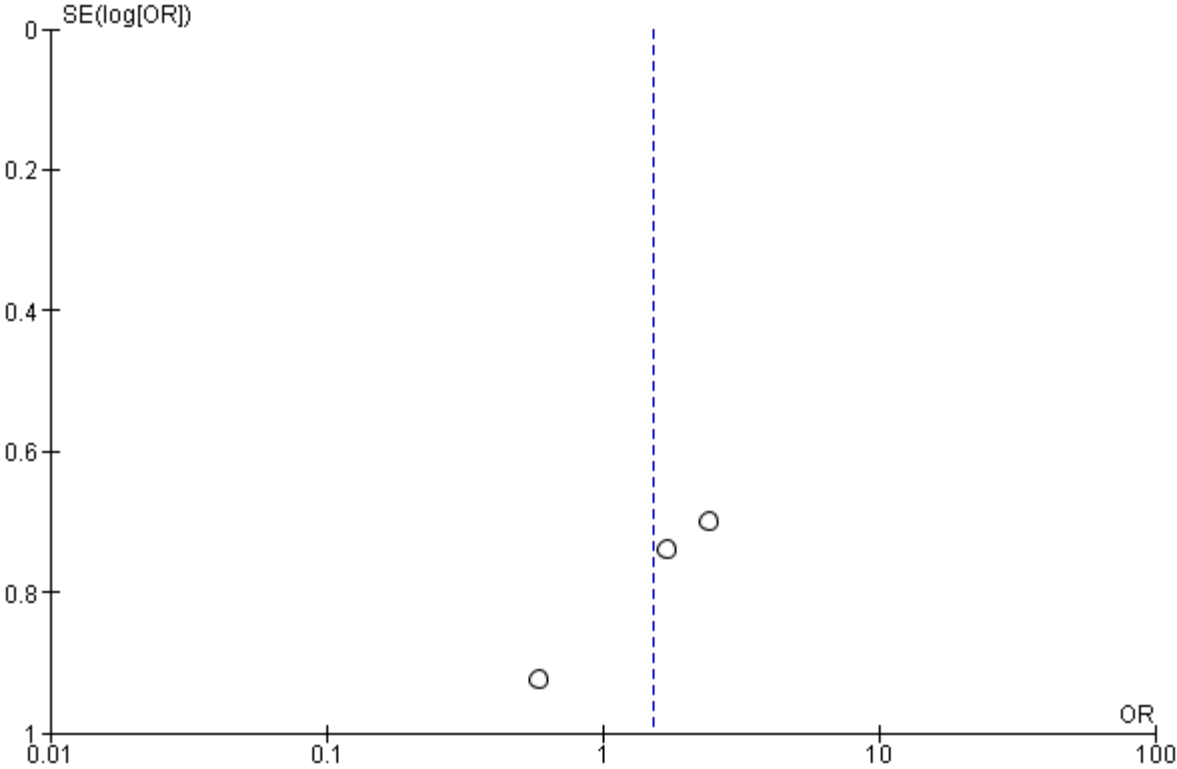

Supplement: MOESM4 [file 16214760]
