# Supplementary material for: Interventions for frail community-dwelling older adults have no significant effect on adverse outcomes: a systematic review and meta-analysis
Source: Springer Nature journal article supplement (doi:10.1186/s12877-018-0936-7), 2018-10-20
Supplement: MOESM5 [file 16214760]

**Additional Figure S3: Critical appraisal**

|                           | Random sequence generation (selection bias) | Allocation concealment (selection bias) | Blinding of participants and personnel (performance bias) | Blinding of outcome assessment (detection bias) | Incomplete outcome data (attrition bias) | Selective reporting (reporting bias) | Other bias |
|---------------------------|---------------------------------------------|-----------------------------------------|-----------------------------------------------------------|-------------------------------------------------|------------------------------------------|--------------------------------------|------------|
| Cameron et al. (2013)     | +                                           | ?                                       | ?                                                         | +                                               | +                                        | +                                    | ?          |
| De Vriendt et al. (2016)  | +                                           | +                                       | -                                                         | +                                               | +                                        | ?                                    | ?          |
| Dorrestein et al. (2015)  | +                                           | +                                       | -                                                         | +                                               | +                                        | +                                    | +          |
| Fairhall et al. (2014)    | +                                           | ?                                       | ?                                                         | +                                               | +                                        | +                                    | ?          |
| Fairhall et al. (2015)    | +                                           | ?                                       | ?                                                         | +                                               | +                                        | +                                    | ?          |
| Favela et al. (2013)      | -                                           | +                                       | -                                                         | +                                               | +                                        | ?                                    | ?          |
| Hall et al. (1992)        | +                                           | +                                       | ?                                                         | +                                               | +                                        | ?                                    | ?          |
| Kehusmaa et al. (2010)    | +                                           | +                                       | ?                                                         | +                                               | +                                        | ?                                    | ?          |
| Kim et al. (2015)         | +                                           | +                                       | +                                                         | +                                               | +                                        | ?                                    | -          |
| Kono et al. (2013)        | +                                           | +                                       | ?                                                         | ?                                               | ?                                        | ?                                    | ?          |
| Kono et al. (2016)        | +                                           | +                                       | -                                                         | +                                               | +                                        | +                                    | ?          |
| Metzelthin et al. (2014)  | -                                           | ?                                       | ?                                                         | +                                               | +                                        | +                                    | ?          |
| Metzelthin et al. (2015)  | -                                           | ?                                       | ?                                                         | +                                               | +                                        | +                                    | ?          |
| Monteserin et al. (2010)  | +                                           | +                                       | -                                                         | +                                               | ?                                        | ?                                    | ?          |
| Perttola et al. (2016)    | +                                           | +                                       | -                                                         | -                                               | ?                                        | +                                    | ?          |
| Upatising et al. (2013)   | ?                                           | +                                       | -                                                         | +                                               | -                                        | ?                                    | ?          |
| Van Hout et al. (2010)    | +                                           | +                                       | -                                                         | +                                               | +                                        | ?                                    | ?          |
| Van Leeuwen et al. (2015) | -                                           | +                                       | -                                                         | +                                               | -                                        | +                                    | -          |
| Williams et al. (1987)    | +                                           | +                                       | +                                                         | +                                               | +                                        | +                                    | ?          |
